# Supplementary material for: Receipt, Spending, and Clinical Correlates of the Economic Impact Payment Among Middle- and Low-Income U.S. Adults
Source: Atypon-hosted journal article supplement (doi:10.1176/appi.ps.202100001), 2021-06-02
Supplement: appi.ps.202100001.ds001.pdf [file appi.ps.202100001.ds001.pdf]

Supplementary Table 1. Multiple regressions between planned expenses and screening positive for mental health or alcohol use problem

| Planned expenses | Current MDD+ screen | Current GAD+ screen | COVID-19 era-related stress+ screen | Any recent illicit drug use |
|------------------|---------------------|---------------------|-------------------------------------|-----------------------------|
| Toiletries       | .06**               | .04*                | .13**                               | .10**                       |
| Cigarettes       | .09**               | .05*                | .09**                               | .16**                       |
| Alcohol          | .10**               | .07**               | .06**                               | .17**                       |
| Gambling/lottery | .08**               | .05*                | .06**                               | .14**                       |

Note: Regression analyses controlled for sociodemographics, number of medical conditions, and COVID-19 status. \* $p < .01$ , \*\* $p < .001$

Supplementary Table 2. Correlational analyses between problems paying expenses and receipt of the economic impact payment (EIP) and clinical/psychosocial variables

| Ran out of money in past month... | Current MDD+ screen | Current GAD+ screen | COVID-19 era-related stress+ screen | Current AUD+ screen | Received EIP |
|-----------------------------------|---------------------|---------------------|-------------------------------------|---------------------|--------------|
| Paying rent or mortgage           | .24*                | .25*                | .25*                                | .16*                | -.04*        |
| Utilities                         | .23*                | .24*                | .26*                                | .15*                | -.02         |
| Food                              | .36*                | .36*                | .37*                                | .20*                | -.05*        |
| Transportation                    | .21*                | .22*                | .23*                                | .13*                | <.00         |
| Clothing                          | .20*                | .19*                | .22*                                | .10*                | -.01         |
| Medical care                      | .18*                | .18*                | .18*                                | .07*                | -.01         |
| None                              | -.44*               | -.44*               | -.45*                               | -.25*               | .07*         |

Note: MDD= Major Depressive Disorder; GAD= Generalized Anxiety Disorder; AUD= Alcohol Use Disorder; MH= Mental Health; SA= Substance Abuse. \*p<.001
